# Supplementary material for: Polyoxometalate-derived electrocatalysts enabling progress in hydrogen evolution reactions
Source: Royal Society of Chemistry journal article supplement (doi:10.1039/d4dt01261e), 2024-01-01
Supplement: d4dt01261e1.pdf [file d4dt01261e1.pdf]

## Polyoxometalate-Derived Electrocatalysts Enabling Progress in Hydrogen Evolution Reactions

Shaohua Zhu<sup>a</sup>, Haijun Pang<sup>\*a</sup>, Zhe Sun<sup>a</sup>, Shifa Ullah Khan<sup>\*b</sup>, Ghulam Mustafa<sup>b</sup>, Huiyuan Ma<sup>\*a</sup>, Xinming Wang<sup>a</sup>, and Guixin Yang<sup>a</sup>

**Table S1** Comparison of HER performance of POM-based Electrocatalysts

| Catalysts                                               | Polyoxometalate                                                                                          | $\eta_{10}$ (mV) | Tafel slope<br>(mV·dec <sup>-1</sup> ) | Electrolyte                          | Refs |
|---------------------------------------------------------|----------------------------------------------------------------------------------------------------------|------------------|----------------------------------------|--------------------------------------|------|
| CoP/MoP@NC                                              | PMo <sub>12</sub> O <sub>40</sub>                                                                        | 94               | 81                                     | 1M KOH                               | 1    |
| PMo <sub>12</sub> @PVP@Zn/Ni-ZIF                        | PMo <sub>12</sub> O <sub>40</sub>                                                                        | 151              | 112                                    | 1M KOH                               | 2    |
| Co/Ni-POM/NFs                                           | PMo <sub>12</sub> O <sub>40</sub>                                                                        | 68               | 60.8                                   | 1M KOH                               | 3    |
| HPOM-MoP/C                                              | PMo <sub>12</sub> O <sub>40</sub>                                                                        | 135              | —                                      | 1M KOH                               | 4    |
|                                                         |                                                                                                          | 163              | —                                      | 0.5 M H <sub>2</sub> SO <sub>4</sub> |      |
|                                                         |                                                                                                          | 166              | —                                      | PBS                                  |      |
| MoP/MoNiP@NC                                            | PMo <sub>12</sub>                                                                                        | 94               | 88                                     | 1M KOH                               | 5    |
|                                                         |                                                                                                          | 137              | 70                                     | 0.5 M H <sub>2</sub> SO <sub>4</sub> |      |
| Co <sub>9</sub> S <sub>8</sub> @MoS <sub>2</sub>        | PMo <sub>12</sub>                                                                                        | 230              | 84                                     | 1M KOH                               | 6    |
| CoS <sub>2</sub> -MoS <sub>2</sub> -VS <sub>2</sub> -CC | PMoV <sub>4</sub> Mo <sup>VI</sup> <sub>8</sub> O <sub>40</sub> (V <sup>IV</sup> O) <sub>2</sub>         | 152              | 107                                    | 1M KOH                               | 7    |
|                                                         | and<br>PMoV <sub>10</sub> Mo <sup>VI</sup> <sub>2</sub> O <sub>40</sub> (V <sup>IV</sup> O) <sub>2</sub> |                  |                                        |                                      |      |
| Co/WC@NC                                                | PW <sub>12</sub> O <sub>40</sub>                                                                         | 158              | 95                                     | 1M KOH                               | 8    |
|                                                         |                                                                                                          | 142              | 93                                     | 0.5 M H <sub>2</sub> SO <sub>4</sub> |      |
| NiCo-POM/Ni                                             | PW <sub>12</sub> O <sub>40</sub>                                                                         | 64               | 75                                     | 1M KOH                               | 9    |
| POM@ZnCoS/NF                                            | PW <sub>12</sub> O <sub>40</sub>                                                                         | 170              | 67.7                                   | 1M KOH                               | 10   |
| NiCo <sub>2</sub> S <sub>4</sub> /PANI@POM/rGO          | PW <sub>12</sub> O <sub>40</sub>                                                                         | 197              | 47.5                                   | 1M KOH                               | 11   |
| CNT-g-PSSCo/PW <sub>12</sub>                            | PW <sub>12</sub> O <sub>40</sub>                                                                         | 31               | 25                                     | 0.5 M H <sub>2</sub> SO <sub>4</sub> | 12   |
| Pd <sup>0</sup> @POM/GC                                 | PW <sub>17</sub> V <sup>IV</sup> O <sub>62</sub>                                                         | ~20              | 52-83                                  | 0.5 M H <sub>2</sub> SO <sub>4</sub> | 13   |
| Co <sub>5</sub> Mo <sub>10</sub> S <sub>x</sub>         | Co <sub>2</sub> Mo <sub>10</sub> O <sub>38</sub>                                                         | 35               | 56                                     | 1M KOH                               | 14   |
| CoS <sub>2</sub> @MoS <sub>2</sub>                      | GeMo <sub>12</sub> O <sub>40</sub>                                                                       | 87               | 87                                     | 1M KOH                               | 15   |
|                                                         |                                                                                                          | 65               | 122                                    | 0.5 M H <sub>2</sub> SO <sub>4</sub> |      |
| RuPOM/KB                                                | SiW <sub>10</sub> O <sub>36</sub>                                                                        | 760              | —                                      | Seawater (pH 8.1)                    | 16   |
| NiFe LDH-POM/NF                                         | SiW <sub>11</sub> O <sub>39</sub>                                                                        | 156              | 86                                     | 0.1M KOH                             | 17   |
| Pt-SiW <sub>11</sub> Co/SiW <sub>11</sub> Co-CNP/GC     | SiW <sub>11</sub> O <sub>39</sub> Co                                                                     | 150±4            | 61±1                                   | 0.5 M H <sub>2</sub> SO <sub>4</sub> | 18   |

|                                                                                                                                  |                                   |                       |      |                                      |    |
|----------------------------------------------------------------------------------------------------------------------------------|-----------------------------------|-----------------------|------|--------------------------------------|----|
| [Co <sub>2</sub> (3,3'-bpy)(3,5'-bpy)(4,3'-bpy)](H <sub>2</sub> O) <sub>3</sub> [SiW <sub>12</sub> O <sub>40</sub> ]             | SiW <sub>12</sub> O <sub>40</sub> | 92                    | 92.1 | 1M KOH                               | 19 |
| Pt-STA-CB                                                                                                                        | SiW <sub>12</sub> O <sub>40</sub> | 33.8                  | 27.9 | 0.5 M H <sub>2</sub> SO <sub>4</sub> | 20 |
| {Cu <sub>2</sub> (3-bptzp) <sub>3</sub> (H <sub>2</sub> O) <sub>4</sub> [SiW <sub>12</sub> O <sub>40</sub> ]}·H <sub>2</sub> O   | SiW <sub>12</sub> O <sub>40</sub> | 59.4                  | 74.2 | 0.1M KOH                             | 21 |
| {Cu <sub>2</sub> (3-bptzpe) <sub>2</sub> (H <sub>2</sub> O) <sub>8</sub> [SiW <sub>12</sub> O <sub>40</sub> ]}·4H <sub>2</sub> O |                                   |                       |      |                                      |    |
| {Cu <sub>2</sub> (3-bptzh) <sub>3</sub> (H <sub>2</sub> O) <sub>6</sub> [SiW <sub>12</sub> O <sub>40</sub> ]}                    |                                   |                       |      |                                      |    |
| Ni-Mo <sub>2</sub> C/NPC                                                                                                         | NiMo <sub>6</sub> O <sub>24</sub> | η <sub>500</sub> =295 | 64   | 1M KOH                               | 22 |
|                                                                                                                                  |                                   | η <sub>500</sub> =268 | 59   | 0.5 M H <sub>2</sub> SO <sub>4</sub> |    |
| CoP-WP/rGO                                                                                                                       | Co <sub>8</sub> W <sub>18</sub>   | 96                    | 62   | 1M KOH                               | 23 |
|                                                                                                                                  |                                   | 130                   | 54   | 0.5 M H <sub>2</sub> SO <sub>4</sub> |    |
|                                                                                                                                  |                                   | 138                   | 80   | PBS                                  |    |

### Reference:

1. Y.-J. Tang, H.-J. Zhu, L.-Z. Dong, A.-M. Zhang, S.-L. Li, J. Liu and Y.-Q. Lan, *Applied Catalysis B: Environmental*, 2019, **245**, 528-535.
2. S. Li, Z. Yang, Z. Liu, Y. Ma, Y. Gu, L. Zhao, Q. Zhou and W. Xu, *J. Colloid Interface Sci.*, 2021, **592**, 349-357.
3. Z. Zhang, Y. Meng, H. Su, G. Dong, B. Zhao, W. Zhang, G. Yin and Y. Liu, *New J. Chem.*, 2021, **45**(26), 11536-11543.
4. B. T. Jebslinhepzybai, E. Samaraj, T. Kesavan, M. Sasidharan and J. A. Selvi, *Sustain. Energ. Fuels*, 2022, **6**(2), 289-298.
5. J. Li, Y. Liu, X. Li, Q. Pan, D. Sun, L. Men, B. Sun, C. Xu and Z. Su, *Chem. Eng. J.*, 2022, **431**, 133696.
6. L. He, S. Huang, Y. Liu, M. Wang, B. Cui, S. Wu, J. Liu, Z. Zhang and M. Du, *J. Colloid Interface Sci.*, 2021, **586**, 538-550.
7. X. Che, Q. Wu, S. Hu, G. Wang, H. Pang, W. Sun, H. Ma, X. Wang, L. Tan and G. Yang, *J. Solid State Chem.*, 2022, **314**, 123403.
8. Y. Liu, J. Li, D. Sun, L. Men, B. Sun, X. Li, Q. An, F. Liu and Z. Su, *New J. Chem.*, 2022, **46**(1), 178-184.
9. X. Jia, C. Streb and Y. F. Song, *Chemistry—A European Journal*, 2019, **25**(68), 15548-15554.
10. J. Gautam, Y. Liu, J. Gu, Z. Ma, J. Zha, B. Dahal, L. N. Zhang, A. N. Chishti, L. Ni and G. Diao, *Adv. Funct. Mater.*, 2021, **31**(46), 2106147.

11. J. Gautam, Y. Liu, J. Gu, Z. Ma, B. Dahal, A. N. Chishti, L. Ni, G. Diao and Y. Wei, *J. Colloid Interface Sci.*, 2022, **614**, 642-654.
12. Y. Lin, Y. Zhu, Q. Ma, X. Ke, P. Ma, R. Liao, S. Liu and D. Wu, *Macromol. Rapid Commun.*, 2022, **43**(14), 2100915.
13. R. N. Biboum, B. Keita, S. Franger, C. P. N. Njiki, G. Zhang, J. Zhang, T. Liu, I.-M. Mbomekalle and L. Nadjo, *Materials*, 2010, **3**(1), 741-754.
14. Y. Lu, X. Guo, L. Yang, W. Yang, W. Sun, Y. Tuo, Y. Zhou, S. Wang, Y. Pan and W. Yan, *Chem. Eng. J.*, 2020, **394**, 124849.
15. Y. Hou, H. Pang, J. Xin, H. Ma, B. Li, X. Wang and L. Tan, *Adv. Mater. Interfaces*, 2020, **7**(19), 2000780.
16. C. Lee, D. Jeon, J. Park, W. Lee, J. Park, S. J. Kang, Y. Kim and J. Ryu, *ACS Appl. Mater. Interfaces*, 2020, **12**(29), 32689-32697.
17. C. Li, Z. Zhang and R. Liu, *Small*, 2020, **16**(46), 2003777.
18. R. Hashemniaye-Torshizi, N. Ashraf, M. H. Arbab-Zavar and S. Dianat, *Catal. Sci. Technol.*, 2021, **11**(3), 1098-1109.
19. Z. Zhang, C. J. Gómez-García, Q. Wu, J. Xin, H. Pang, H. Ma, D. Chai, S. Li and C. Zhao, *Inorg. Chem.*, 2022, **61**(30), 11830-11836.
20. T. Zhang, S. Weng, X. Wang, Z. Zhang, Y. Gao, T. Lin, Y. Zhu, W. Zhang and C. Sun, *J. Colloid Interface Sci.*, 2022, **624**, 704-712.
21. X.-L. Wang, Y. Tian, Z.-H. Chang and H. Lin, *ACS Sustain. Chem. Eng.*, 2020, **8**(41), 15696-15702.
22. D. Jana, H. K. Kolli, S. Sabnam and S. K. Das, *Chem. Commun.*, 2021, **57**(77), 9910-9913.
23. Y. Jiao, H. Yan, D. Wang, X. Wang, S. Xu, Y. Xie, A. Wu, L. Jiang, C. Tian and R. Wang, *Sci. China-Mater.*, 2022, **65**(5), 1225-1236.
